# Supplementary material for: Highly efficient co-sensitization of nanocrystalline TiO2 electrodes with plural organic dyes
Source: Royal Society of Chemistry journal article supplement (doi:10.1039/b502725j), 2005-01-01
Supplement: b502725j.pdf [file b502725j.pdf]

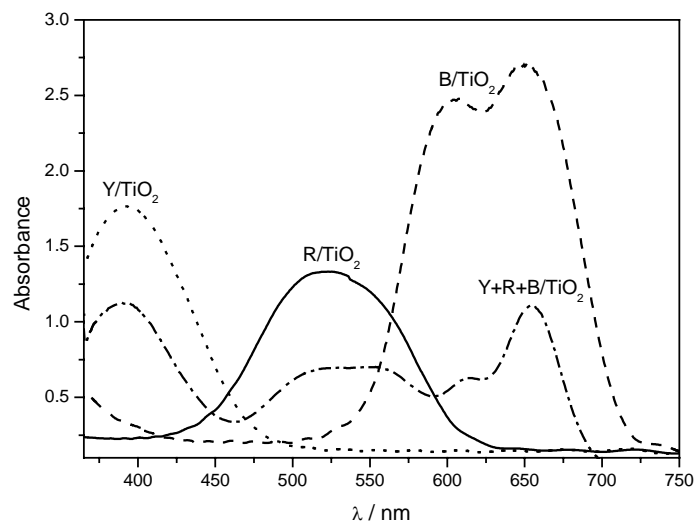

**Figure A** Absorption spectra of TiO<sub>2</sub> films (3 μm thickness) sensitized by the individual dye alone (Y/TiO<sub>2</sub>, R/TiO<sub>2</sub> and B/TiO<sub>2</sub>) and by their combination (Y+R+B/TiO<sub>2</sub>, the molar ratio of Y:R:B in dyeing solutions was 10:20:1).

**Table A** The adsorption amount and ratio of the dyes on TiO<sub>2</sub> films (9 μm thickness).

| Y : R : B<br>(dye solution) <sup>a</sup> | Y : R : B<br>(TiO <sub>2</sub> film) <sup>b</sup> | Y<br>(10 <sup>-8</sup> mol/cm <sup>2</sup> ) <sup>c</sup> | R<br>(10 <sup>-8</sup> mol/cm <sup>2</sup> ) <sup>c</sup> | B<br>(10 <sup>-8</sup> mol/cm <sup>2</sup> ) <sup>c</sup> |
|------------------------------------------|---------------------------------------------------|-----------------------------------------------------------|-----------------------------------------------------------|-----------------------------------------------------------|
| 10 : 50 : 1                              | 2.5 : 1.0 : 0.9                                   | 16.5                                                      | 6.7                                                       | 6.0                                                       |
| 10 : 30 : 1                              | 3.5 : 1.0 : 1.2                                   | 20.1                                                      | 5.7                                                       | 6.7                                                       |
| 10 : 20 : 1                              | 4.1 : 1.0 : 1.3                                   | 22.1                                                      | 5.4                                                       | 7.0                                                       |
| 10 : 10 : 1                              | 5.0 : 1.0 : 1.5                                   | 25.1                                                      | 5.0                                                       | 7.5                                                       |
| 10 : 10 : 5                              | 2.2 : 1.0 : 2.9                                   | 6.9                                                       | 3.2                                                       | 9.3                                                       |
| 10 : 20 : 0                              |                                                   | 27.3                                                      | 7.4                                                       |                                                           |
| 10 : 0 : 1                               |                                                   | 32.1                                                      |                                                           | 10.9                                                      |
| 0 : 20 : 1                               |                                                   |                                                           | 11.8                                                      | 7.9                                                       |
| 1 : 0 : 0                                |                                                   | 37.5                                                      |                                                           |                                                           |
| 1 : 0 : 0 <sup>d</sup>                   |                                                   | 31.4                                                      |                                                           |                                                           |
| 0 : 1 : 0                                |                                                   |                                                           | 14.2                                                      |                                                           |
| 0 : 1 : 0 <sup>d</sup>                   |                                                   |                                                           | 10.9                                                      |                                                           |
| 0 : 0 : 1                                |                                                   |                                                           |                                                           | 18.4                                                      |
| 0 : 0 : 1 <sup>d</sup>                   |                                                   |                                                           |                                                           | 12.0                                                      |

<sup>a</sup>The ratio of the dyes in dyeing solutions; <sup>b</sup>The ratio of the dyes adsorbed on TiO<sub>2</sub> films; <sup>c</sup>The adsorption amount of the dyes on TiO<sub>2</sub> films; <sup>d</sup>1.0 mM of DCA was present in dyeing solutions.
